# Supplementary material for: A Contemporary Evaluation on Posterior Direct Restoration Teaching among Undergraduates in Dental Schools in Malaysia
Source: MDPI journal article supplement (doi:10.3390/dj9100123), 2021-10-19
Supplement: s1 [file s1]

## Figure S1

**TITLE:**

# TEACHING OF POSTERIOR COMPOSITE RESIN RESTORATIONS IN UNDERGRADUATE DENTAL SCHOOLS IN MALAYSIA

This questionnaire is designed to determine the details of posterior restorations curriculum for undergraduate teaching in your school. Please tick in the box provided.

**Part A: SOCIAL DEMOGRAPHIC.**

Q1. Please indicate your University & Department

Name of the University and Department: \_\_\_\_\_

## Part B: TEACHING METHODS FOR POSTERIOR RESTORATIONS

Please tick in the box provided. For each statement, you can choose more than one answer.

Q1. Are formal lectures on posterior restoration topics given to students?

11

11

Q2. Other than formal lectures, other method(s) for teaching is/are:

1

|  |  |
|--|--|
|  |  |
|  |  |

|  |  |
|--|--|
|  |  |
|  |  |

10

Other: \_\_\_\_\_

Q3. Choose the teaching aids and materials that are used for teaching:

11

|  |  |
|--|--|
|  |  |
|--|--|

11

|  |  |
|--|--|
|  |  |
|  |  |

|  |  |
|--|--|
|  |  |
|  |  |

|  |  |
|--|--|
|  |  |
|  |  |

|  |  |
|--|--|
|  |  |
|--|--|

|  |  |
|--|--|
|  |  |
|--|--|

|  |  |
|--|--|
|  |  |
|--|--|

Other: \_\_\_\_\_

Q4. What are the type of assessments conducted to evaluate the students' knowledge on posterior restorations:

|  |  |
|--|--|
|  |  |
|  |  |

|  |  |
|--|--|
|  |  |
|  |  |

|  |  |
|--|--|
|  |  |
|  |  |

|  |  |
|--|--|
|  |  |
|  |  |

|  |  |
|--|--|
|  |  |
|  |  |

11

Other: \_\_\_\_\_

**Part C: PRECLINICAL LABORATORY TEACHING ON POSTERIOR RESTORATIONS**

Please tick in the box provided.

Q1. Do the students need to undergo preclinical teaching of posterior restorations before treating patient?

Yes

☐

No

☐

If the answer for Q1 is NO, please proceed to **Part D**.

Q2. Restorative material(s) used for preclinical teaching of posterior restorations is/are:  
You can tick more than one answer.

Amalgam

Composite resin

Glass ionomer cement (GIC)

Resin modified glass ionomer cement (RMGIC)

Other: \_\_\_\_\_

|  |
|--|
|  |
|  |
|  |
|  |

Q3. Duration of time (hours) that is allocated is:  
Please tick only **ONE (1)** answer for each restorative material.

| Restorative material | 4–8 hours<br>(1-2 sessions) | 12–16 hours<br>(3-4 sessions) | 20–24 hours<br>(5-6 sessions) | More than 24 hours<br>(more than 7 sessions) | Not taught |
|----------------------|-----------------------------|-------------------------------|-------------------------------|----------------------------------------------|------------|
| Amalgam              |                             |                               |                               |                                              |            |
| Composite            |                             |                               |                               |                                              |            |
| Glass ionomer cement |                             |                               |                               |                                              |            |

Q4. Students are provided with instruction manual:

Yes

☐

No

☐

If the answer for Q3 is NO, please proceed to **Q6**.

Q5. Instruction manual provided to the students is generally:  
Please tick only **ONE (1)** answer.

Simple (A basic guideline for posterior restorations)

Comprehensive (Details in every procedure in posterior restorations)

Very comprehensive (Could be used in place of textbook)

Other: \_\_\_\_\_

|  |
|--|
|  |
|  |
|  |

Q6. During the preclinical session, students are using:  
Please tick only **ONE (1)** answer.

Extracted human teeth

Plastic tooth practice model

Both

Other: \_\_\_\_\_

|  |
|--|
|  |
|  |
|  |

Q7. Do the students need to pass the **practical competency test** before they start the clinical session?

a. Proximal amalgam restoration

Yes

☐

No

☐

b. Proximal composite restoration

Yes

☐

No

☐

Q8. Do the students have to complete certain **practical requirement** before they start the clinical session?

- a. Proximal amalgam restoration Yes ☐ No ☐  
b. Proximal composite restoration Yes ☐ No ☐

Q9. Please indicate the number of **premolar teeth** used for preclinical teaching of posterior restorations. Please tick only **ONE (1)** answer for each cavity depth.

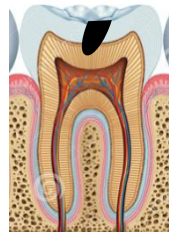

Shallow cavity involving  
outer  $\frac{1}{3}$ rd dentine

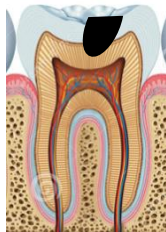

Moderate cavity involving  
middle  $\frac{1}{3}$ rd dentine

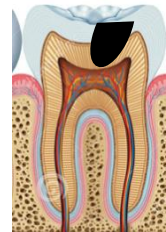

Deep cavity involving  
inner  $\frac{1}{3}$ rd dentine

| Material  | Cavity depth             | 0 | 1 | 2 | 3 | 4 | 5 | More than 5 |
|-----------|--------------------------|---|---|---|---|---|---|-------------|
| Amalgam   | Shallow occlusal cavity  |   |   |   |   |   |   |             |
|           | Moderate occlusal cavity |   |   |   |   |   |   |             |
|           | Deep occlusal cavity     |   |   |   |   |   |   |             |
| Composite | Shallow occlusal cavity  |   |   |   |   |   |   |             |
|           | Moderate occlusal cavity |   |   |   |   |   |   |             |
|           | Deep occlusal cavity     |   |   |   |   |   |   |             |

Q10. Indicate the number of **molar teeth** used for preclinical teaching of posterior restorations. Please tick only **ONE (1)** answer for each cavity depth.

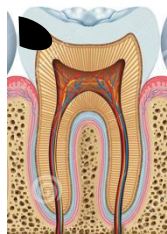

Shallow cavity involving  
outer  $\frac{1}{3}$ rd dentine

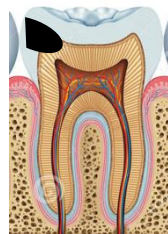

Moderate cavity involving  
middle  $\frac{1}{3}$ rd dentine

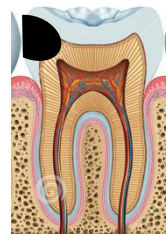

Deep cavity involving  
inner  $\frac{1}{3}$ rd dentine

| Material  | Cavity depth             | 0 | 1 | 2 | 3 | 4 | 5 | More than 5 |
|-----------|--------------------------|---|---|---|---|---|---|-------------|
| Amalgam   | Shallow proximal cavity  |   |   |   |   |   |   |             |
|           | Moderate proximal cavity |   |   |   |   |   |   |             |
|           | Deep proximal cavity     |   |   |   |   |   |   |             |
| Composite | Shallow proximal cavity  |   |   |   |   |   |   |             |
|           | Moderate proximal cavity |   |   |   |   |   |   |             |
|           | Deep proximal cavity     |   |   |   |   |   |   |             |

**Part D: CLINICAL TEACHING, TRAINING & ASSESSMENT ON POSTERIOR RESTORATIONS.**

- Q1. Teaching on the use of **liners and bases** for posterior composite restorations:  
You can tick more than one answer.

| Restorative material | Restorative protocols                               | Moderate cavity | Deep cavity |
|----------------------|-----------------------------------------------------|-----------------|-------------|
| <b>Amalgam</b>       | GIC (base)                                          |                 |             |
|                      | Hard setting calcium hydroxide (liner)              |                 |             |
|                      | Hard setting calcium hydroxide (liner) + GIC (base) |                 |             |
|                      | No liner and/or base                                |                 |             |
| <b>Composite</b>     | GIC (base)                                          |                 |             |
|                      | Hard setting calcium hydroxide (liner)              |                 |             |
|                      | Hard setting calcium hydroxide (liner) + GIC (base) |                 |             |
|                      | No liner and/or base                                |                 |             |

- Q2. Which restorative material(s) is/are recommended for posterior sites?  
You can tick more than one answer.

| Restorative material | Amalgam | Composite | GIC |
|----------------------|---------|-----------|-----|
| Maxillary premolar   |         |           |     |
| Mandibular premolar  |         |           |     |
| Maxillary molar      |         |           |     |
| Mandibular molar     |         |           |     |

- Q3. Which restorative material(s) is/are most commonly placed at posterior sites by students?  
You can tick more than one answer.

| Restorative material | Amalgam | Composite | GIC |
|----------------------|---------|-----------|-----|
| Maxillary premolar   |         |           |     |
| Mandibular premolar  |         |           |     |
| Maxillary molar      |         |           |     |
| Mandibular molar     |         |           |     |

- Q4. What is/are the standard **isolation method(s)** taught for posterior restorations?  
You can tick more than one answer.

| Isolation technique         | Rubber dam | Cotton roll | No isolation required |
|-----------------------------|------------|-------------|-----------------------|
| <b>Amalgam</b>              |            |             |                       |
| <b>Composite resin</b>      |            |             |                       |
| <b>Glass ionomer cement</b> |            |             |                       |

- Q5. Do you think that the teaching and use of posterior amalgam restorations is still relevant?  
Please tick only **ONE (1)** answer.

Highly relevant  
Possibly relevant  
Possibly not relevant  
Not relevant

|  |
|--|
|  |
|  |
|  |
|  |

- Q6. What is the standard **restorative technique** taught for posterior composite restorations?  
You can tick more than one answer.

| Restorative technique | Bulk fill | Incremental fill |
|-----------------------|-----------|------------------|
| Shallow cavity        |           |                  |
| Moderate cavity       |           |                  |
| Deep cavity           |           |                  |

- Q7. Please indicate the **restorative protocol(s)** taught for posterior composite restorations?  
You can choose more than one answer for each statement.

| Criteria                                                 | Restorative protocols                                    | Yes | No |
|----------------------------------------------------------|----------------------------------------------------------|-----|----|
| Bevelling                                                | Bevel occlusal margins                                   |     |    |
|                                                          | Bevel the proximal box margins                           |     |    |
|                                                          | No bevel                                                 |     |    |
| Matrix and wedging techniques<br>(for proximal cavities) | Circumferential metal band with wooden wedge             |     |    |
|                                                          | Sectional metal band with wooden wedge                   |     |    |
|                                                          | Transparent matrix band with a light-transmitting wedges |     |    |
|                                                          | Sectional matrix system (Palodent)                       |     |    |
| Bonding system                                           | Total-etch system                                        |     |    |
|                                                          | Self-etch system                                         |     |    |
| Curing lights used                                       | Quartz-halogen light                                     |     |    |
|                                                          | Light emitting diode (LED) light                         |     |    |
|                                                          | Both lights                                              |     |    |
| Finishing techniques                                     | Finishing with water cooling                             |     |    |
|                                                          | Finishing without water cooling                          |     |    |
| Finishing instruments                                    | Finishing diamond burs                                   |     |    |
|                                                          | Finishing TC burs                                        |     |    |
|                                                          | Finishing discs                                          |     |    |
|                                                          | Finishing strips                                         |     |    |

- Q8. Do the final year students have to complete certain clinical requirement for posterior restorations before they are allowed to sit for final examination?

| Restorative Material | Yes | No |
|----------------------|-----|----|
| Amalgam              |     |    |
| Composite            |     |    |

- Q9. Please indicate the assessment/s conducted to evaluate the students' clinical competency?  
You can choose more than one answer.

Clinical viva

Clinical competency test

Objective structural clinical examination (OSCE)

Self-assessment

Peer-assessment

Other: \_\_\_\_\_

|  |
|--|
|  |
|  |
|  |
|  |
|  |

- Q10. Do you anticipate any changes to this aspect of your curriculum in the next year or two based on the new literature findings?

|  |
|--|
|  |
|  |
|  |

Thank you most sincerely for completing this questionnaire.
